# Supplementary material for: LnIII/MnII–LnIII complexes derived from a salicylic azo dye ligand: synthesis, structures, magnetic and fluorescence properties
Source: Royal Society of Chemistry journal article supplement (doi:10.1039/d3dt02876c), 2023-01-01
Supplement: d3dt02876c1.pdf [file d3dt02876c1.pdf]

## Ln<sup>III</sup>/Mn<sup>II</sup>-Ln<sup>III</sup> complexes derived from salicylic azo dye ligand: synthesis, structures, magnetic and fluorescent properties

Xiaoman Kuang, Youhong Li, Meng Yang\*, Wen Dong\*, Jidong Leng\*

Guangzhou Key Laboratory for Environmentally Functional Materials and Technology, School of Chemistry and Chemical Engineering, Guangzhou University, 230 Wai Huan Xi Road, Guangzhou Higher Education Mega Center, Guangzhou 510006, P. R.China.

**Table S1** Crystallographic data and structure refinement parameters summary for complexes **1–4**.

| Complex                                                      | <b>1 Dy</b>                                                                     | <b>2 Tb</b>                        | <b>3 Dy</b>                                                                                     | <b>4 Tb</b>        |
|--------------------------------------------------------------|---------------------------------------------------------------------------------|------------------------------------|-------------------------------------------------------------------------------------------------|--------------------|
| Formula                                                      | C <sub>60</sub> H <sub>78</sub> N <sub>30</sub> O <sub>33</sub> Ln <sub>2</sub> |                                    | C <sub>54</sub> H <sub>70</sub> Mn <sub>2</sub> N <sub>36</sub> O <sub>34</sub> Ln <sub>2</sub> |                    |
| Formula weight                                               | 2072.52                                                                         | 2065.38                            | 2202.34                                                                                         | 2195.20            |
| <i>T</i> (K)                                                 | 100.00(11)                                                                      | 150.00(10)                         | 100.00(10)                                                                                      | 100.00(10)         |
| Crystal system                                               | Monoclinic                                                                      | Monoclinic                         | Triclinic                                                                                       | Triclinic          |
| Space group                                                  | <i>P</i> 2 <sub>1</sub> / <i>C</i>                                              | <i>P</i> 2 <sub>1</sub> / <i>C</i> | <i>P</i> $\bar{1}$                                                                              | <i>P</i> $\bar{1}$ |
| <i>a</i> (Å)                                                 | 18.5421(4)                                                                      | 18.5550(4)                         | 11.6378(2)                                                                                      | 11.6539(3)         |
| <i>b</i> (Å)                                                 | 24.3774(5)                                                                      | 24.2497(5)                         | 13.8140(2)                                                                                      | 13.7912(3)         |
| <i>c</i> (Å)                                                 | 20.5877(5)                                                                      | 20.6085(5)                         | 15.5581(2)                                                                                      | 15.5805(4)         |
| $\alpha$ (deg)                                               | 90                                                                              | 90                                 | 112.2770(10)                                                                                    | 112.238(2)         |
| $\beta$ (deg)                                                | 100.629(2)                                                                      | 100.863(2)                         | 94.1640(10)                                                                                     | 94.0138(19)        |
| $\gamma$ (deg)                                               | 90                                                                              | 90                                 | 108.0530(10)                                                                                    | 108.238(2)         |
| $\theta$ (deg)                                               | 2.179–25.010                                                                    | 2.158–30.928                       | 3.144–77.05                                                                                     | 4.594–61.866       |
| <i>V</i> (Å <sup>3</sup> )                                   | 9146.1(4)                                                                       | 9106.7(4)                          | 2148.59(6)                                                                                      | 2147.48(10)        |
| <i>Z</i>                                                     | 4                                                                               | 4                                  | 1                                                                                               | 2                  |
| <i>D</i> <sub>c</sub> (g·cm <sup>-3</sup> )                  | 1.505                                                                           | 1.506                              | 1.702                                                                                           | 1.697              |
| $\mu$ (mm <sup>-1</sup> )                                    | 1.714                                                                           | 1.634                              | 12.383                                                                                          | 2.017              |
| Unique reflns,                                               | 16124                                                                           | 28828                              | 9088                                                                                            | 13599              |
| <i>R</i> <sub>int</sub>                                      | 0.0524                                                                          | 0.0543                             | 0.0425                                                                                          | 0.0692             |
| GOF                                                          | 1.015                                                                           | 1.016                              | 1.031                                                                                           | 1.012              |
| <i>R</i> <sub>1</sub> ( <i>I</i> > 2 $\sigma$ ( <i>I</i> ))  | 0.0648                                                                          | 0.0618                             | 0.0506                                                                                          | 0.0434             |
| <i>wR</i> <sub>2</sub> ( <i>I</i> > 2 $\sigma$ ( <i>I</i> )) | 0.1534                                                                          | 0.1379                             | 0.1437                                                                                          | 0.1092             |
| <i>R</i> <sub>1</sub> (all data)                             | 0.0846                                                                          | 0.0964                             | 0.0561                                                                                          | 0.0553             |
| <i>wR</i> <sub>2</sub> (all data)                            | 0.1665                                                                          | 0.1506                             | 0.1545                                                                                          | 0.1142             |

$$R_1 = \Sigma(|F_o| - |F_c|) / \Sigma|F_o| \quad wR_2 = [\Sigma w(|F_o|^2 - |F_c|^2)^2 / \Sigma w(|F_o|^2)^2]^{1/2}$$

**Table S2** Selected bond lengths (Å) and angles (°) for complex **1**.

| <i>Bond distances</i> |          |            |          |
|-----------------------|----------|------------|----------|
| Dy(1)–O(1)            | 2.346(6) | Dy(1)–O(2) | 2.395(6) |
| Dy(1)–O(4)            | 2.314(5) | Dy(1)–O(5) | 2.405(5) |
| Dy(1)–O(7)            | 2.309(5) | Dy(1)–O(8) | 2.463(5) |

|                   |            |                   |            |
|-------------------|------------|-------------------|------------|
| Dy(1)–O(10)       | 2.398(6)   | Dy(1)–O(11)       | 2.418(6)   |
| Dy(2)–O(16)       | 2.325(5)   | Dy(2)–O(17)       | 2.411(6)   |
| Dy(2)–O(19)       | 2.320(5)   | Dy(2)–O(20)       | 2.424(5)   |
| Dy(2)–O(22)       | 2.309(6)   | Dy(2)–O(23)       | 2.472(6)   |
| Dy(2)–O(25)       | 2.408(6)   | Dy(2)–O(26)       | 2.385(5)   |
| <i>Angles</i>     |            |                   |            |
| O(1)-Dy(1)-O(2)   | 71.6(2)    | O(1)-Dy(1)-O(4)   | 79.27(19)  |
| O(1)-Dy(1)-O(5)   | 118.9(2)   | O(1)-Dy(1)-O(7)   | 148.02(18) |
| O(1)-Dy(1)-O(8)   | 79.76(19)  | O(1)-Dy(1)-O(10)  | 77.2(2)    |
| O(1)-Dy(1)-O(11)  | 136.6(2)   | O(2)-Dy(1)-O(4)   | 114.1(2)   |
| O(2)-Dy(1)-O(5)   | 72.82(19)  | O(2)-Dy(1)-O(7)   | 139.76(19) |
| O(2)-Dy(1)-O(8)   | 147.00(18) | O(2)-Dy(1)-O(10)  | 84.1(2)    |
| O(2)-Dy(1)-O(11)  | 74.2(2)    | O(4)-Dy(1)-O(5)   | 72.30(18)  |
| O(4)-Dy(1)-O(7)   | 79.81(19)  | O(4)-Dy(1)-O(8)   | 74.95(18)  |
| O(4)-Dy(1)-O(10)  | 143.5(2)   | O(4)-Dy(1)-O(11)  | 140.24(19) |
| O(5)-Dy(1)-O(7)   | 76.66(18)  | O(5)-Dy(1)-O(8)   | 137.56(17) |
| O(5)-Dy(1)-O(10)  | 144.0(2)   | O(5)-Dy(1)-O(11)  | 73.9(2)    |
| O(7)-Dy(1)-O(8)   | 71.59(18)  | O(7)-Dy(1)-O(10)  | 107.1(2)   |
| O(7)-Dy(1)-O(11)  | 72.5(2)    | O(8)-Dy(1)-O(10)  | 73.74(19)  |
| O(8)-Dy(1)-O(11)  | 120.3(2)   | O(10)-Dy(1)-O(11) | 73.4(2)    |
| O(16)-Dy(2)-O(17) | 72.61(19)  | O(16)-Dy(2)-O(19) | 77.65(18)  |
| O(16)-Dy(2)-O(20) | 118.08(19) | O(16)-Dy(2)-O(22) | 147.51(19) |
| O(16)-Dy(2)-O(23) | 79.32(19)  | O(16)-Dy(2)-O(25) | 135.2(2)   |
| O(16)-Dy(2)-O(26) | 78.2(2)    | O(17)-Dy(2)-O(19) | 115.04(19) |
| O(17)-Dy(2)-O(20) | 73.92(18)  | O(17)-Dy(2)-O(22) | 139.22(19) |
| O(17)-Dy(2)-O(23) | 147.79(18) | O(17)-Dy(2)-O(25) | 72.5(2)    |
| O(17)-Dy(2)-O(26) | 85.1(2)    | O(19)-Dy(2)-O(20) | 71.70(17)  |
| O(19)-Dy(2)-O(22) | 80.44(19)  | O(19)-Dy(2)-O(23) | 72.75(18)  |
| O(19)-Dy(2)-O(25) | 143.66(19) | O(19)-Dy(2)-O(26) | 141.63(19) |
| O(20)-Dy(2)-O(22) | 76.38(19)  | O(20)-Dy(2)-O(23) | 135.07(17) |
| O(20)-Dy(2)-O(25) | 77.28(19)  | O(20)-Dy(2)-O(26) | 146.61(19) |
| O(22)-Dy(2)-O(23) | 71.40(19)  | O(22)-Dy(2)-O(25) | 74.2(2)    |
| O(22)-Dy(2)-O(26) | 106.0(2)   | O(23)-Dy(2)-O(25) | 121.0(2)   |
| O(23)-Dy(2)-O(26) | 73.83(19)  | O(25)-Dy(2)-O(26) | 71.7(2)    |

**Table S3** Selected bond lengths (Å) and angles (°) for complex **2**.

|                       |          |             |          |
|-----------------------|----------|-------------|----------|
| <i>Bond distances</i> |          |             |          |
| Tb(1)–O(1)            | 2.336(4) | Tb(1)–O(2)  | 2.382(4) |
| Tb(1)–O(4)            | 2.295(4) | Tb(1)–O(5)  | 2.403(4) |
| Tb(1)–O(7)            | 2.291(4) | Tb(1)–O(8)  | 2.455(3) |
| Tb(1)–O(10)           | 2.369(4) | Tb(1)–O(11) | 2.393(4) |
| Tb(2)–O(16)           | 2.320(4) | Tb(2)–O(17) | 2.402(5) |
| Tb(2)–O(19)           | 2.302(4) | Tb(2)–O(20) | 2.409(4) |

|                   |            |                   |            |
|-------------------|------------|-------------------|------------|
| Tb(2)–O(22)       | 2.278(5)   | Tb(2)–O(23)       | 2.475(5)   |
| Tb(2)–O(25)       | 2.405(5)   | Tb(2)–O(26)       | 2.360(4)   |
| <i>Angles</i>     |            |                   |            |
| O(1)–Tb(1)–O(2)   | 71.77(15)  | O(1)–Tb(1)–O(4)   | 79.84(15)  |
| O(1)–Tb(1)–O(5)   | 120.41(15) | O(1)–Tb(1)–O(7)   | 148.05(13) |
| O(1)–Tb(1)–O(8)   | 78.95(14)  | O(1)–Tb(1)–O(10)  | 76.72(18)  |
| O(1)–Tb(1)–O(11)  | 134.99(16) | O(2)–Tb(1)–O(4)   | 113.80(18) |
| O(2)–Tb(1)–O(5)   | 72.90(14)  | O(2)–Tb(1)–O(7)   | 139.76(14) |
| O(2)–Tb(1)–O(8)   | 146.99(13) | O(2)–Tb(1)–O(10)  | 85.12(18)  |
| O(2)–Tb(1)–O(11)  | 73.87(19)  | O(4)–Tb(1)–O(5)   | 72.70(13)  |
| O(4)–Tb(1)–O(7)   | 80.47(13)  | O(4)–Tb(1)–O(8)   | 74.54(12)  |
| O(4)–Tb(1)–O(10)  | 143.21(14) | O(4)–Tb(1)–O(11)  | 141.68(14) |
| O(5)–Tb(1)–O(7)   | 76.60(13)  | O(5)–Tb(1)–O(8)   | 137.35(12) |
| O(5)–Tb(1)–O(10)  | 144.03(14) | O(5)–Tb(1)–O(11)  | 74.48(15)  |
| O(7)–Tb(1)–O(8)   | 71.67(12)  | O(7)–Tb(1)–O(10)  | 105.82(17) |
| O(7)–Tb(1)–O(11)  | 73.13(16)  | O(8)–Tb(1)–O(10)  | 73.43(14)  |
| O(8)–Tb(1)–O(11)  | 120.58(16) | O(10)–Tb(1)–O(11) | 72.19(16)  |
| O(16)–Tb(2)–O(17) | 72.74(16)  | O(16)–Tb(2)–O(19) | 78.28(13)  |
| O(16)–Tb(2)–O(20) | 118.55(15) | O(16)–Tb(2)–O(22) | 147.23(18) |
| O(16)–Tb(2)–O(23) | 78.84(16)  | O(16)–Tb(2)–O(25) | 135.60(18) |
| O(16)–Tb(2)–O(26) | 77.98(16)  | O(17)–Tb(2)–O(19) | 114.76(15) |
| O(17)–Tb(2)–O(20) | 73.26(15)  | O(17)–Tb(2)–O(22) | 139.43(18) |
| O(17)–Tb(2)–O(23) | 147.79(15) | O(17)–Tb(2)–O(25) | 72.8(2)    |
| O(17)–Tb(2)–O(26) | 85.13(19)  | O(19)–Tb(2)–O(20) | 71.86(13)  |
| O(19)–Tb(2)–O(22) | 80.20(16)  | O(19)–Tb(2)–O(23) | 72.79(15)  |
| O(19)–Tb(2)–O(25) | 142.60(15) | O(19)–Tb(2)–O(26) | 142.37(16) |
| O(20)–Tb(2)–O(22) | 76.88(16)  | O(20)–Tb(2)–O(23) | 135.57(14) |
| O(20)–Tb(2)–O(25) | 76.25(15)  | O(20)–Tb(2)–O(26) | 145.71(16) |
| O(22)–Tb(2)–O(23) | 71.33(17)  | O(22)–Tb(2)–O(25) | 73.9(2)    |
| O(22)–Tb(2)–O(26) | 105.84(18) | O(23)–Tb(2)–O(25) | 121.6(2)   |
| O(23)–Tb(2)–O(26) | 74.27(19)  | O(25)–Tb(2)–O(26) | 70.8(2)    |

**Table S4** Selected bond lengths (Å) and angles (°) for complex **3**.

|                       |          |              |          |
|-----------------------|----------|--------------|----------|
| <i>Bond distances</i> |          |              |          |
| Dy(1)–O(1)            | 2.372(3) | Dy(1)–O(2)   | 2.270(3) |
| Dy(1)–O(4)            | 2.317(4) | Dy(1)–O(5)   | 2.270(4) |
| Dy(1)–O(7)            | 2.343(4) | Dy(1)–O(8)   | 2.274(4) |
| Dy(1)–O(10)           | 2.325(4) | Dy(1)–O(11)  | 2.326(4) |
| Mn(1)–O(17)           | 2.103(5) | Mn(1)–N(4)   | 2.224(5) |
| Mn(1)–N(6)            | 2.481(5) | Mn(1)–O(17a) | 2.103(5) |
| Mn(1)–N(4a)           | 2.224(5) | Mn(1)–N(6a)  | 2.481(5) |
| Mn(2)–O(12)           | 2.140(4) | Mn(2)–O(13)  | 2.173(5) |
| Mn(2)–O(14)           | 2.206(4) | Mn(2)–O(12b) | 2.140(4) |

|                                   |            |                   |            |
|-----------------------------------|------------|-------------------|------------|
| Mn(2)–O(13b)                      | 2.173(5)   | Mn(2)–O(14b)      | 2.206(4)   |
| <i>Angles</i>                     |            |                   |            |
| O(1)-Dy(1)-O(2)                   | 72.87(12)  | O(1)-Dy(1)-O(4)   | 144.53(13) |
| O(1)-Dy(1)-O(5)                   | 76.14(13)  | O(1)-Dy(1)-O(7)   | 141.27(14) |
| O(1)-Dy(1)-O(8)                   | 76.03(13)  | O(1)-Dy(1)-O(10)  | 120.41(15) |
| O(1)-Dy(1)-O(11)                  | 72.85(13)  | O(2)-Dy(1)-O(4)   | 138.92(14) |
| O(2)-Dy(1)-O(5)                   | 146.30(14) | O(2)-Dy(1)-O(7)   | 79.62(14)  |
| O(2)-Dy(1)-O(8)                   | 80.67(14)  | O(2)-Dy(1)-O(10)  | 71.81(14)  |
| O(2)-Dy(1)-O(11)                  | 104.84(14) | O(4)-Dy(1)-O(5)   | 74.71(15)  |
| O(4)-Dy(1)-O(7)                   | 72.21(14)  | O(4)-Dy(1)-O(8)   | 117.27(15) |
| O(4)-Dy(1)-O(10)                  | 72.04(16)  | O(4)-Dy(1)-O(11)  | 81.63(15)  |
| O(5)-Dy(1)-O(7)                   | 119.28(15) | O(5)-Dy(1)-O(8)   | 79.29(14)  |
| O(5)-Dy(1)-O(10)                  | 137.58(16) | O(5)-Dy(1)-O(11)  | 77.89(14)  |
| O(7)-Dy(1)-O(8)                   | 73.00(16)  | O(7)-Dy(1)-O(10)  | 73.97(18)  |
| O(7)-Dy(1)-O(11)                  | 141.94(16) | O(8)-Dy(1)-O(10)  | 140.05(16) |
| O(8)-Dy(1)-O(11)                  | 144.90(14) | O(10)-Dy(1)-O(11) | 71.91(16)  |
| N(4)-Mn(1)-N(6)                   | 69.01(16)  | N(4)-Mn(1)-O(17)  | 90.26(19)  |
| N(6)-Mn(1)-O(17)                  | 93.44(16)  | O(12)-Mn(2)-O(13) | 89.18(17)  |
| O(12)-Mn(2)-O(14)                 | 88.20(18)  | O(13)-Mn(2)-O(14) | 91.65(19)  |
| a : 2–x,2–y,2–z; b : 2–x,2–y,1–z. |            |                   |            |

**Table S5** Selected bond lengths (Å) and angles (°) for complex **4**.

|                       |          |                 |           |
|-----------------------|----------|-----------------|-----------|
| <i>Bond distances</i> |          |                 |           |
| Tb(1)–O(1)            | 2.387(3) | Tb(1)–O(2)      | 2.284(3)  |
| Tb(1)–O(4)            | 2.343(3) | Tb(1)–O(5)      | 2.293(3)  |
| Tb(1)–O(7)            | 2.360(3) | Tb(1)–O(8)      | 2.285(3)  |
| Tb(1)–O(10)           | 2.351(3) | Tb(1)–O(11)     | 2.350(3)  |
| Mn(1)–O(17)           | 2.102(4) | Mn(1)–N(4)      | 2.223(4)  |
| Mn(1)–N(6)            | 2.486(3) | Mn(1)–O(17a)    | 2.102(4)  |
| Mn(1)–N(4a)           | 2.223(4) | Mn(1)–N(6a)     | 2.486(3)  |
| Mn(2)–O(12)           | 2.147(3) | Mn(2)–O(13)     | 2.176(3)  |
| Mn(2)–O(14)           | 2.198(3) | Mn(2)–O(12b)    | 2.147(3)  |
| Mn(2)–O(13b)          | 2.176(3) | Mn(2)–O(14b)    | 2.198(3)  |
| <i>Angles</i>         |          |                 |           |
| O(1)-Tb(1)-O(2)       | 72.56(9) | O(1)-Tb(1)-O(4) | 144.71(9) |

|                   |            |                   |            |
|-------------------|------------|-------------------|------------|
| O(1)-Tb(1)-O(5)   | 75.97(10)  | O(1)-Tb(1)-O(7)   | 141.71(10) |
| O(1)-Tb(1)-O(8)   | 76.51(10)  | O(1)-Tb(1)-O(10)  | 119.60(11) |
| O(1)-Tb(1)-O(11)  | 72.66(10)  | O(2)-Tb(1)-O(4)   | 139.28(10) |
| O(2)-Tb(1)-O(5)   | 145.96(11) | O(2)-Tb(1)-O(7)   | 79.15(10)  |
| O(2)-Tb(1)-O(8)   | 80.84(10)  | O(2)-Tb(1)-O(10)  | 71.88(10)  |
| O(2)-Tb(1)-O(11)  | 104.83(10) | O(4)-Tb(1)-O(5)   | 74.70(11)  |
| O(4)-Tb(1)-O(7)   | 72.60(10)  | O(4)-Tb(1)-O(8)   | 116.39(11) |
| O(4)-Tb(1)-O(10)  | 72.74(11)  | O(4)-Tb(1)-O(11)  | 82.10(10)  |
| O(5)-Tb(1)-O(7)   | 120.21(11) | O(5)-Tb(1)-O(8)   | 79.51(10)  |
| O(5)-Tb(1)-O(10)  | 137.25(11) | O(5)-Tb(1)-O(11)  | 77.35(10)  |
| O(7)-Tb(1)-O(8)   | 72.49(12)  | O(7)-Tb(1)-O(10)  | 73.64(13)  |
| O(7)-Tb(1)-O(11)  | 142.36(12) | O(8)-Tb(1)-O(10)  | 140.46(11) |
| O(8)-Tb(1)-O(11)  | 145.01(10) | O(10)-Tb(1)-O(11) | 71.44(12)  |
| N(4)-Mn(1)-N(6)   | 69.05(12)  | N(4)-Mn(1)-O(17)  | 90.25(15)  |
| N(6)-Mn(1)-O(17)  | 94.21(13)  | O(12)-Mn(2)-O(13) | 89.58(13)  |
| O(12)-Mn(2)-O(14) | 89.30(13)  | O(13)-Mn(2)-O(14) | 91.90(13)  |

a : 2-x,2-y,2-z; b : 2-x,2-y,1-z.

**Table S6** SHAPE analysis for complexes **1–4**.

| <b>Complex</b> | <b>Ln</b>  | <b>SAPR-8</b> | <b>TDD-8</b> | <b>JBTPR-8</b> | <b>BTPR-8</b> |
|----------------|------------|---------------|--------------|----------------|---------------|
| <b>1</b>       | <b>Dy1</b> | <b>0.452</b>  | 1.509        | 2.026          | 1.659         |
|                | <b>Dy2</b> | <b>0.572</b>  | 1.397        | 2.001          | 1.609         |
| <b>2</b>       | <b>Tb1</b> | <b>0.547</b>  | 1.320        | 1.961          | 1.563         |
|                | <b>Tb2</b> | <b>0.581</b>  | 1.391        | 1.862          | 1.554         |
| <b>3</b>       | <b>Dy1</b> | <b>0.392</b>  | 1.638        | 1.901          | 1.321         |
| <b>4</b>       | <b>Tb1</b> | <b>0.400</b>  | 1.632        | 1.896          | 1.324         |

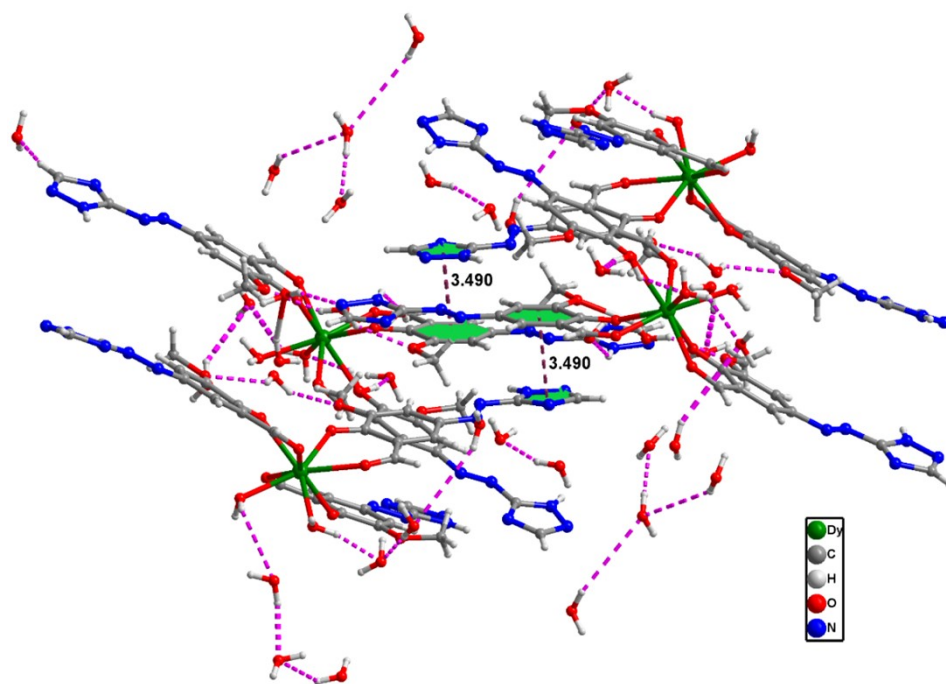

**Figure S1** The hydrogen-bonds and the  $\pi$ - $\pi$  stacking interaction in complex 1.

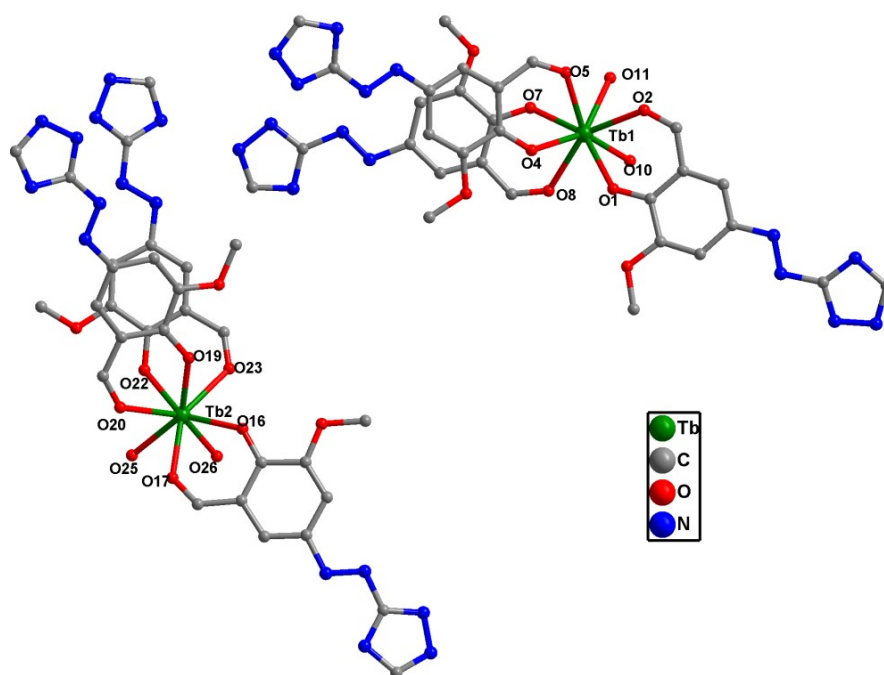

**Figure S2** Crystal structure of complex 2. Hydrogen atoms and uncoordinated solvent molecules were omitted for clarity reason.

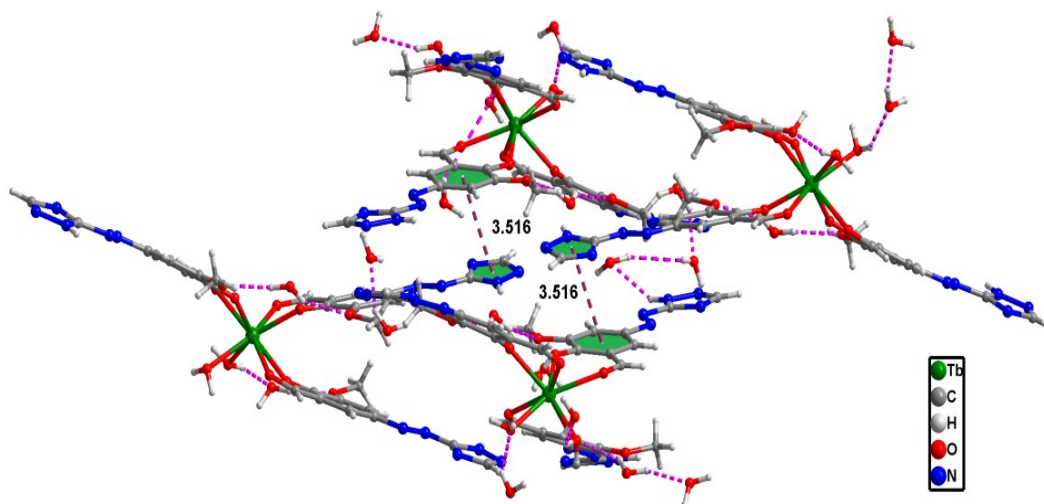

**Figure S3** The hydrogen-bonds and the  $\pi$ - $\pi$  stacking interaction in complex 2.

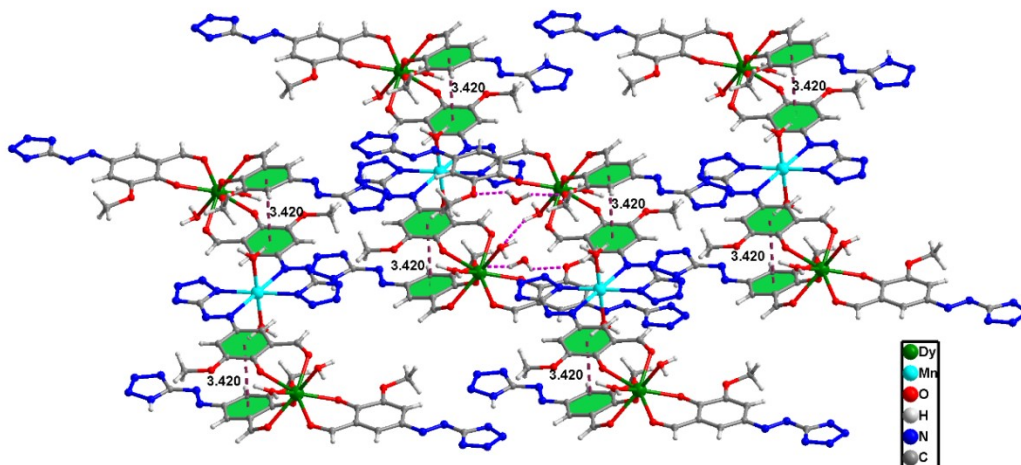

**Figure S4** The hydrogen-bonds and the  $\pi$ - $\pi$  stacking interaction in complex 3.

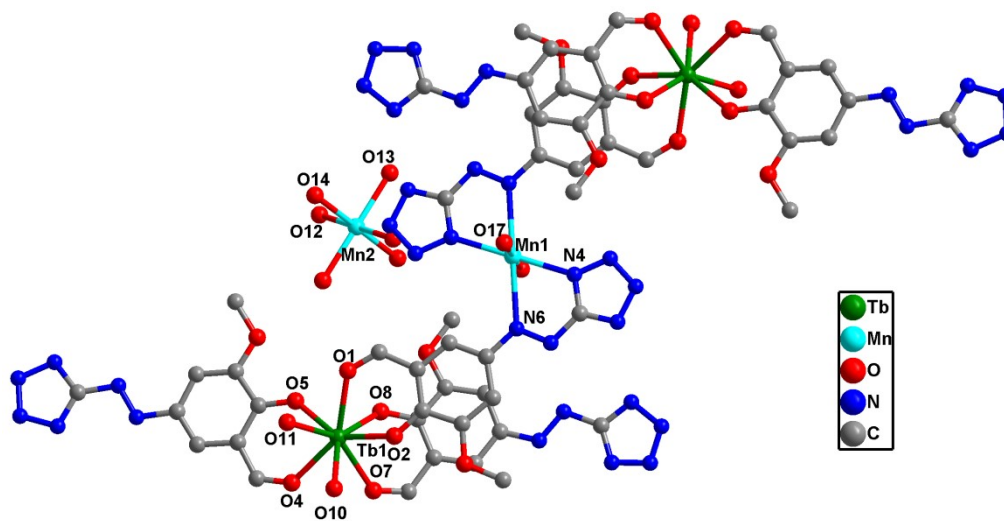

**Figure S5** Crystal structure of complex 4. Hydrogen atoms and uncoordinated solvent molecules

were omitted for clarity reason.

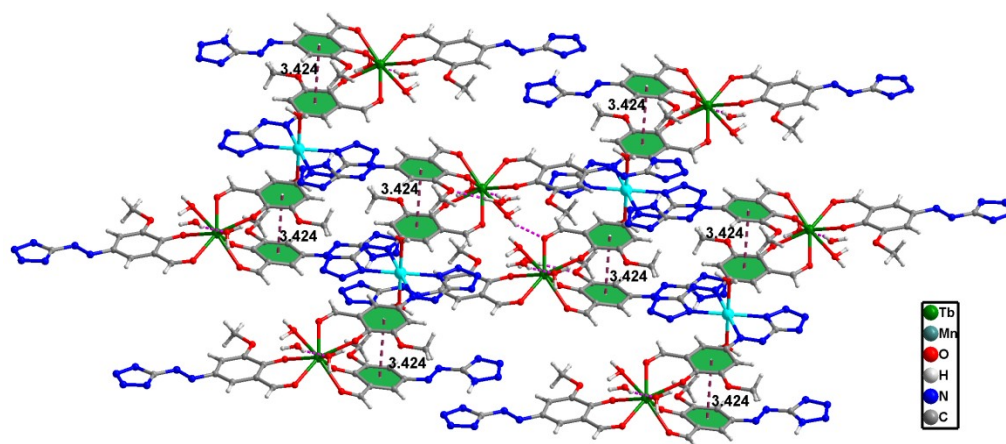

**Figure S6** The hydrogen-bonds and the  $\pi$ - $\pi$  stacking interaction in complex 4.

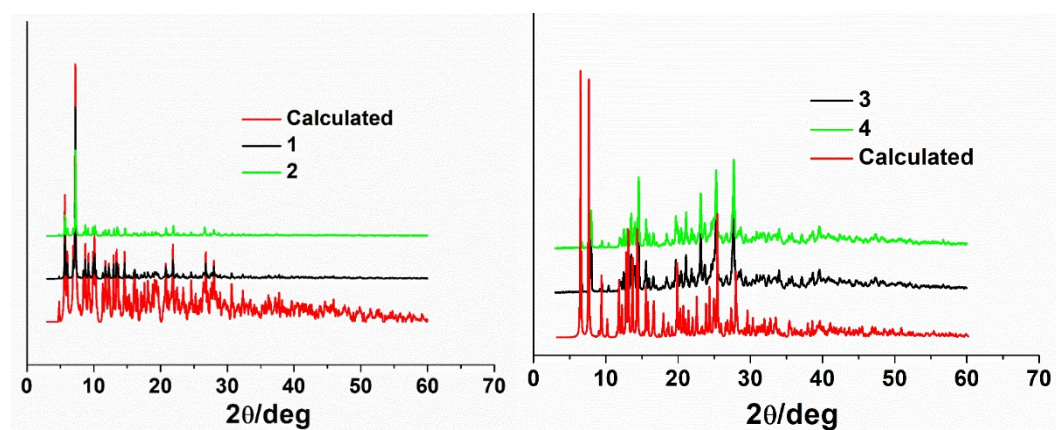

**Figure S7** Powder X-ray diffraction (PXRD) patterns for complexes 1–4.

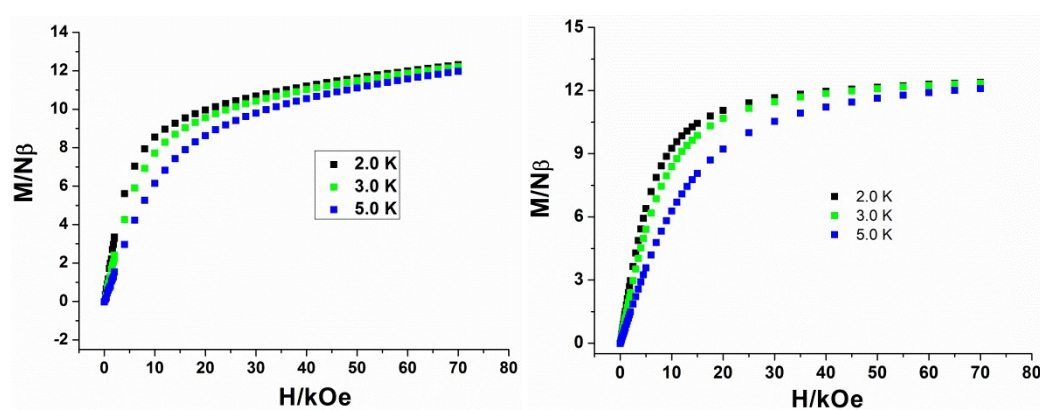



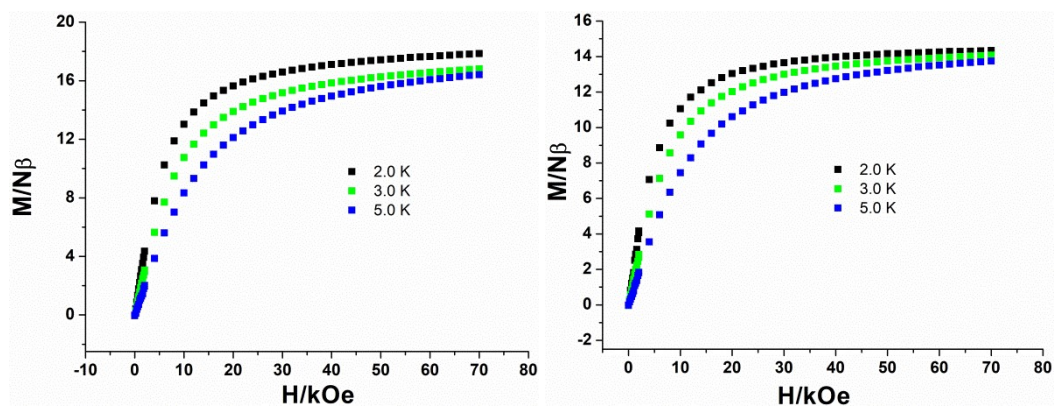

Figure S8  $M$  versus  $H$  plot at 2, 3, 5 K for complexes 1–4.

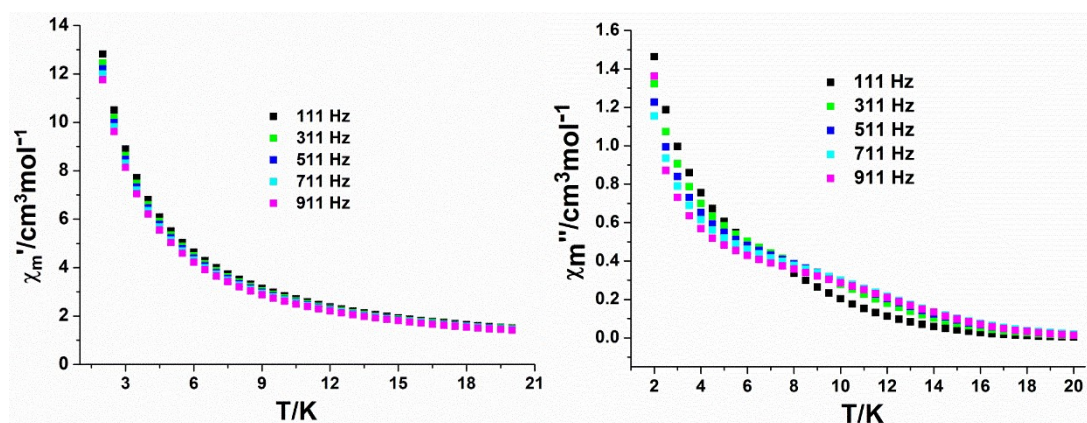

Figure S9 Temperature dependence of the in-phase and out-phase in zero field for complex 1.

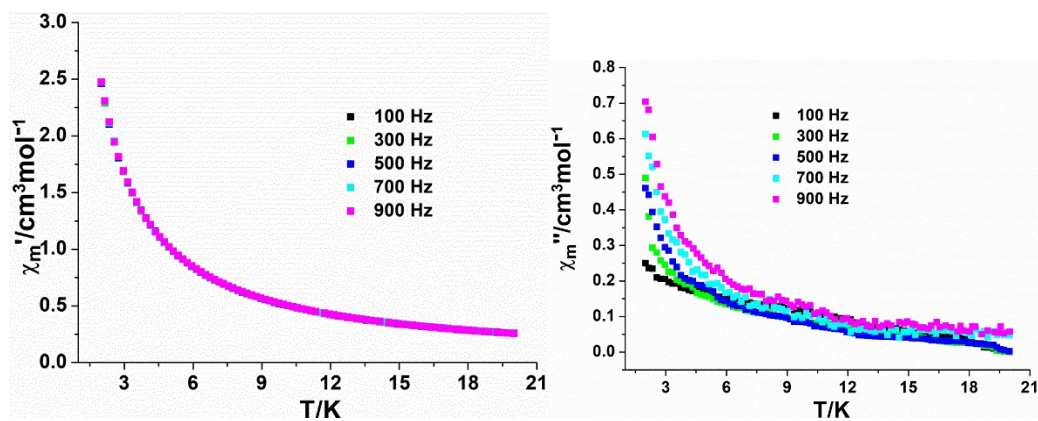

Figure S10 Temperature-dependence of in-phase and out-phase in zero field for complex 2.

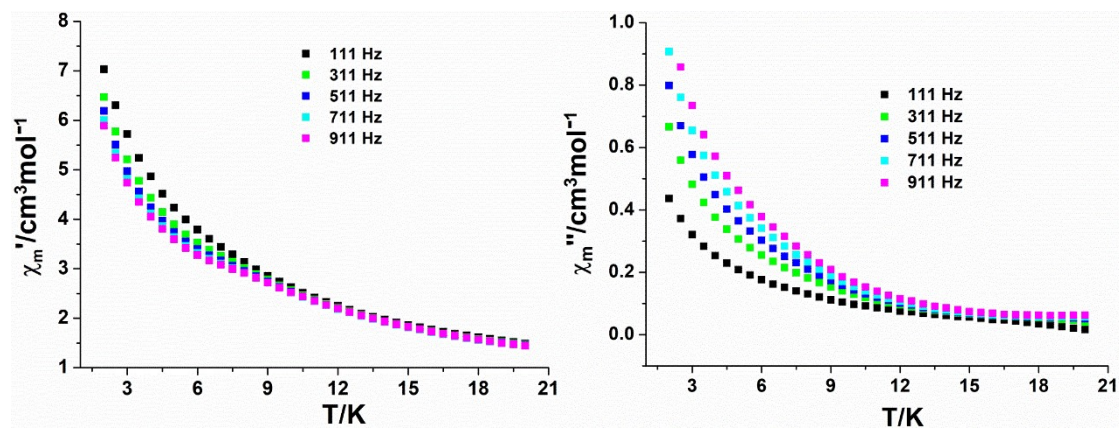

Figure S11 Temperature dependence of the in-phase and out-phase in zero field for complex 3.

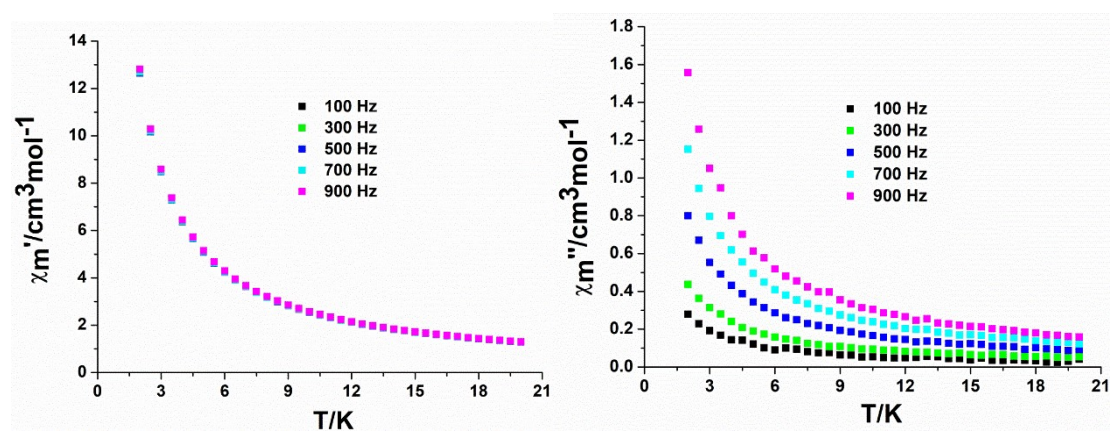

Figure S12 Temperature-dependence of in-phase and out-phase in zero field for complex 4.

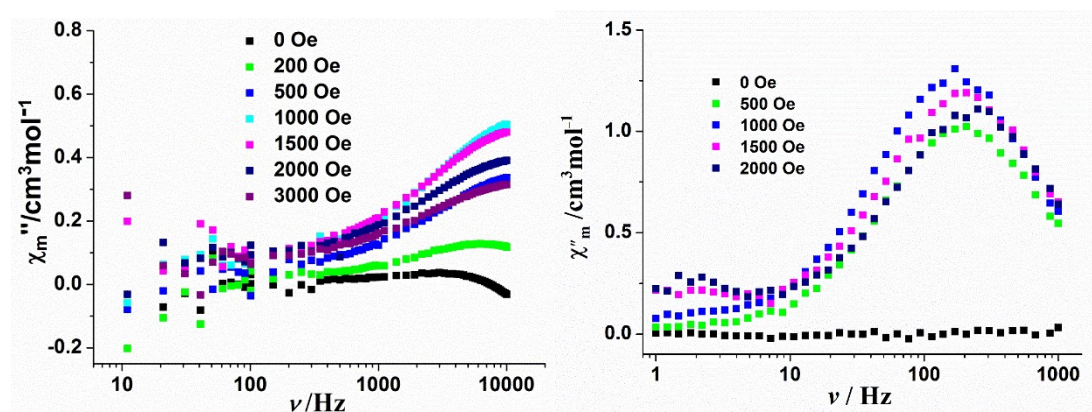



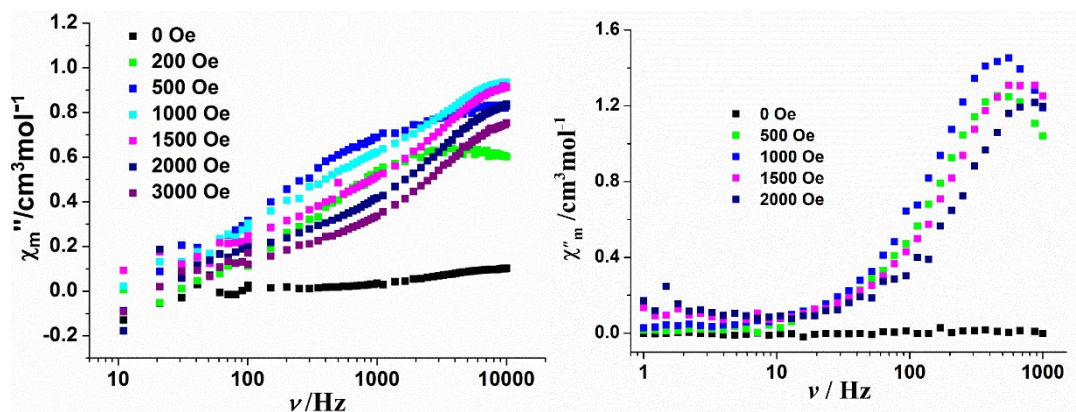

**Figure S13** AC susceptibility data for complexes **1–4** at 2 K under dc applied fields in the range 1-1000/10000 Hz.

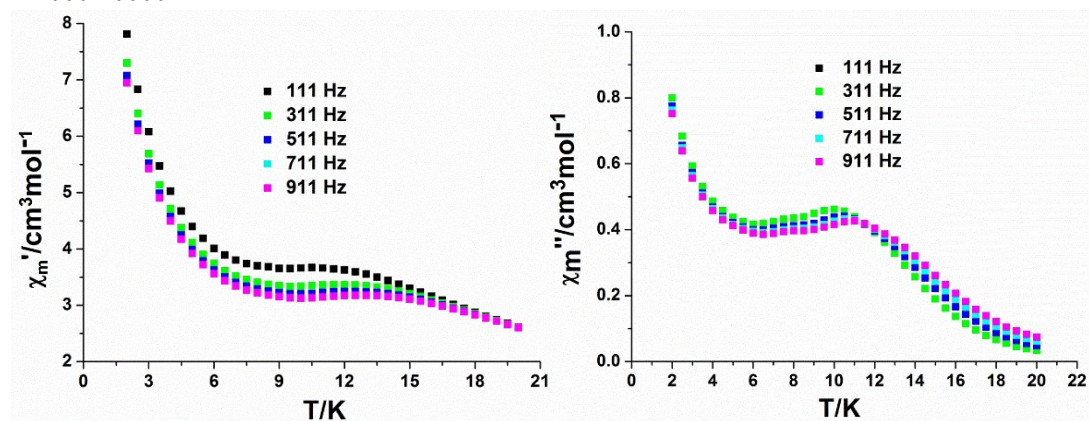

**Figure S14** Temperature-dependence of in-phase and out-of-phase in 1000Oe dc field for complex **1**.

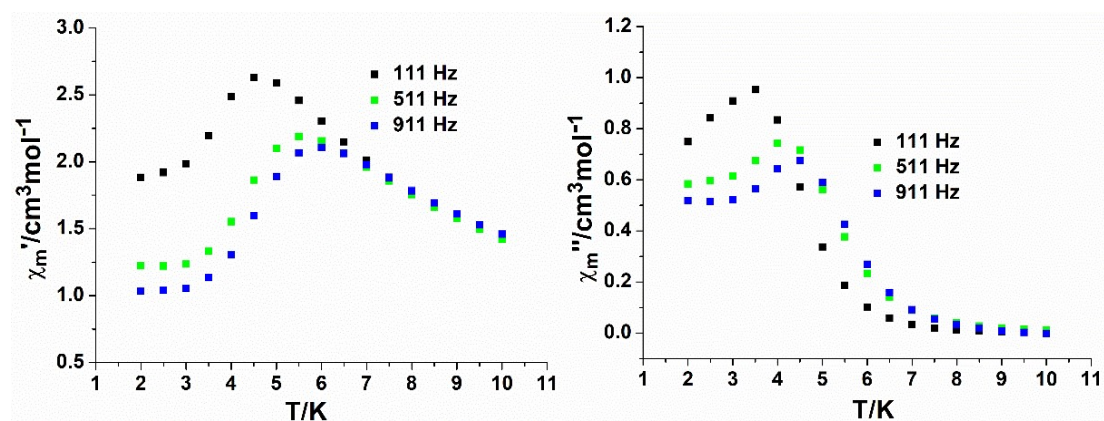

**Figure S15** Temperature-dependence of in-phase and out-of-phase in 1000Oe dc field for complex **2**.

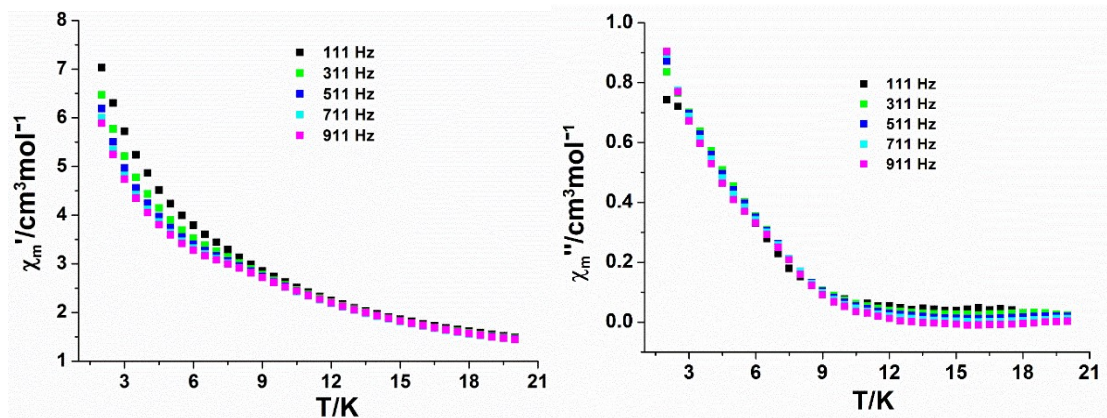

Figure S16 Temperature-dependence of in-phase and out-phase in 1000Oe dc field for complex 3.

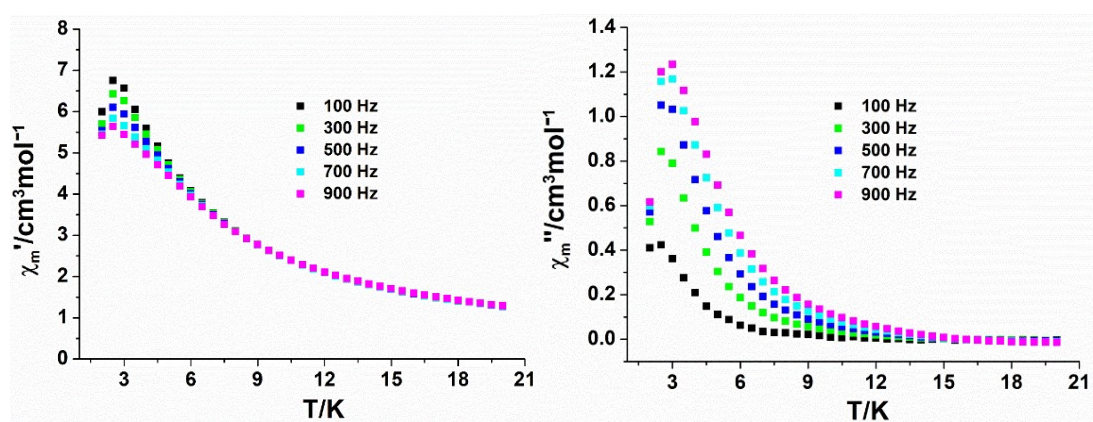

Figure S17 Temperature-dependence of in-phase and out-phase in 1000 Oe dc field for complex 4.

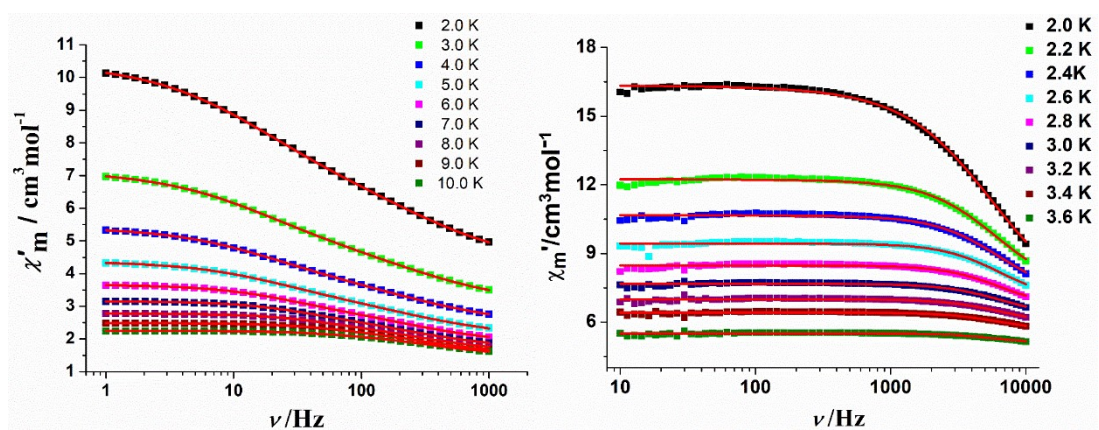



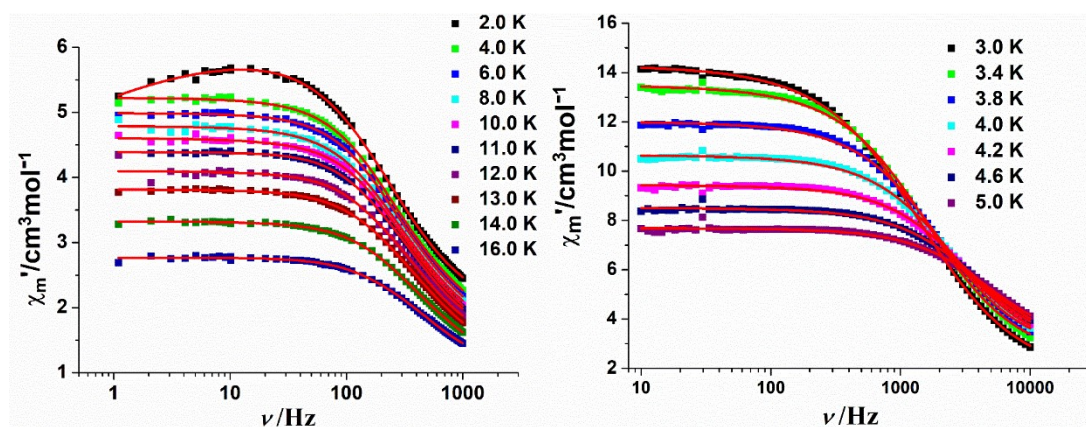

**Figure S18** Frequency dependence of  $\chi''$  ac susceptibility components under 1000 Oe dc field for complexes of **1–4**.

**Table S7** The energies and  $g$ -tensors ( $g_x$ ,  $g_y$ ,  $g_z$ ) of the low-lying spin-orbit states for individual Dy<sup>III</sup> fragments in complex **1**.

|          | Dy1                  |              |            | Dy2                  |              |            |
|----------|----------------------|--------------|------------|----------------------|--------------|------------|
|          | $E / \text{cm}^{-1}$ | $g$ -tensors | $m_J$      | $E / \text{cm}^{-1}$ | $g$ -tensors | $m_J$      |
| <b>1</b> | 0                    | 0.002        | $\pm 15/2$ | 0                    | 0.001        | $\pm 15/2$ |
|          |                      | 0.003        |            |                      | 0.002        |            |
|          |                      | 19.736       |            |                      | 19.715       |            |
| <b>2</b> | 161.7                | 0.036        | $\pm 13/2$ | 160.8                | 0.049        | $\pm 13/2$ |
|          |                      | 0.044        |            |                      | 0.053        |            |
|          |                      | 17.157       |            |                      | 17.008       |            |
| <b>3</b> | 277.9                | 0.463        | $\pm 11/2$ | 275.6                | 1.914        | $\pm 11/2$ |
|          |                      | 0.652        |            |                      | 3.250        |            |
|          |                      | 13.780       |            |                      | 12.086       |            |
| <b>4</b> | 335.1                | 2.739        | $\pm 5/2$  | 312.9                | 0.124        | $\pm 1/2$  |
|          |                      | 4.819        |            |                      | 4.234        |            |
|          |                      | 13.543       |            |                      | 13.300       |            |
| <b>5</b> | 371.1                | 1.112        | $\pm 7/2$  | 358.9                | 0.264        | $\pm 7/2$  |
|          |                      | 2.728        |            |                      | 2.996        |            |
|          |                      | 13.908       |            |                      | 13.539       |            |
| <b>6</b> | 401.0                | 0.680        | $\pm 1/2$  | 375.9                | 10.006       | $\pm 5/2$  |
|          |                      | 3.746        |            |                      | 7.124        |            |
|          |                      | 15.313       |            |                      | 2.662        |            |
| <b>7</b> | 444.1                | 0.644        | $\pm 3/2$  | 418.8                | 1.298        | $\pm 3/2$  |
|          |                      | 1.302        |            |                      | 1.896        |            |
|          |                      | 17.961       |            |                      | 17.882       |            |
| <b>8</b> | 589.8                | 0.015        | $\pm 9/2$  | 564.0                | 0.020        | $\pm 9/2$  |
|          |                      | 0.024        |            |                      | 0.037        |            |
|          |                      | 19.503       |            |                      | 19.588       |            |

**Table S8** The energies and  $g$ -tensors ( $g_x$ ,  $g_y$ ,  $g_z$ ) of the low-lying spin-orbit states for individual

Tb<sup>III</sup> fragments in complex 2.

|          | Tb1 of 2             |              |         | Tb2 of 2             |              |         |
|----------|----------------------|--------------|---------|----------------------|--------------|---------|
|          | $E / \text{cm}^{-1}$ | $g$ -tensors | $m_J$   | $E / \text{cm}^{-1}$ | $g$ -tensors | $m_J$   |
| <b>1</b> | 0                    | 0.000        | $\pm 6$ | 0                    | 0.000        | $\pm 6$ |
|          | 0.089                | 0.000        |         | 0.087                | 0.000        |         |
|          |                      | 17.762       |         |                      | 17.758       |         |
| <b>2</b> | 151.1                | 0.000        | $\pm 5$ | 127.8                | 0.000        | $\pm 5$ |
|          | 152.0                | 0.000        |         | 128.4                | 0.000        |         |
|          |                      | 14.820       |         |                      | 15.322       |         |
| <b>3</b> | 211.8                | 0.000        | $\pm 4$ | 170.1                | 0.000        | $\pm 4$ |
|          | 213.8                | 0.000        |         | 171.7                | 0.000        |         |
|          |                      | 14.256       |         |                      | 13.011       |         |
| <b>4</b> | 293.7                | 0.000        | $\pm 3$ | 260.6                | 0.000        | $\pm 3$ |
|          | 304.1                | 0.000        |         | 267.6                | 0.000        |         |
|          |                      | 9.122        |         |                      | 9.222        |         |
| <b>5</b> | 372.8                | 0.000        | $\pm 2$ | 336.6                | 0.000        | $\pm 2$ |
|          | 406.2                | 0.000        |         | 366.2                | 0.000        |         |
|          |                      | 5.665        |         |                      | 5.573        |         |
| <b>6</b> | 436.7                | 0.000        | $\pm 1$ | 396.6                | 0.000        | $\pm 1$ |
|          | 540.3                | 0.000        |         | 509.2                | 0.000        |         |
|          |                      | 2.801        |         |                      | 2.879        |         |
| <b>7</b> | 545.0                |              |         | 513.2                |              | 0       |

**Table S9** Wave functions with definite projection of the total moment  $|m_J\rangle$  for the lowest two doublets of Dy1, Dy2, Tb1, Tb2 fragments.

|            | $E / \text{cm}^{-1}$ | Wave functions                                                              |
|------------|----------------------|-----------------------------------------------------------------------------|
| <b>Dy1</b> | 0                    | 97.8% $ \pm 15/2\rangle$                                                    |
|            | 161.7                | 84.8% $ \pm 13/2\rangle$ + 9.4% $ \pm 11/2\rangle$                          |
| <b>Dy2</b> | 0                    | 97.4% $ \pm 15/2\rangle$                                                    |
|            | 160.8                | 85.9% $ \pm 13/2\rangle$ + 7.6% $ \pm 11/2\rangle$ + 5.5% $ \pm 9/2\rangle$ |
| <b>Tb1</b> | 0                    | 98% $ \pm 6\rangle$                                                         |
|            | 0.089                |                                                                             |
|            | 151.1                | 85% $ \pm 5\rangle$ + 8% $ \pm 4\rangle$                                    |
|            | 152.0                |                                                                             |
| <b>Tb2</b> | 0                    | 97% $ \pm 6\rangle$                                                         |
|            | 0.106                |                                                                             |
|            | 116.2                | 70% $ \pm 5\rangle$ + 16% $ \pm 4\rangle$ + 6% $ \pm 3\rangle$              |
|            | 116.6                |                                                                             |

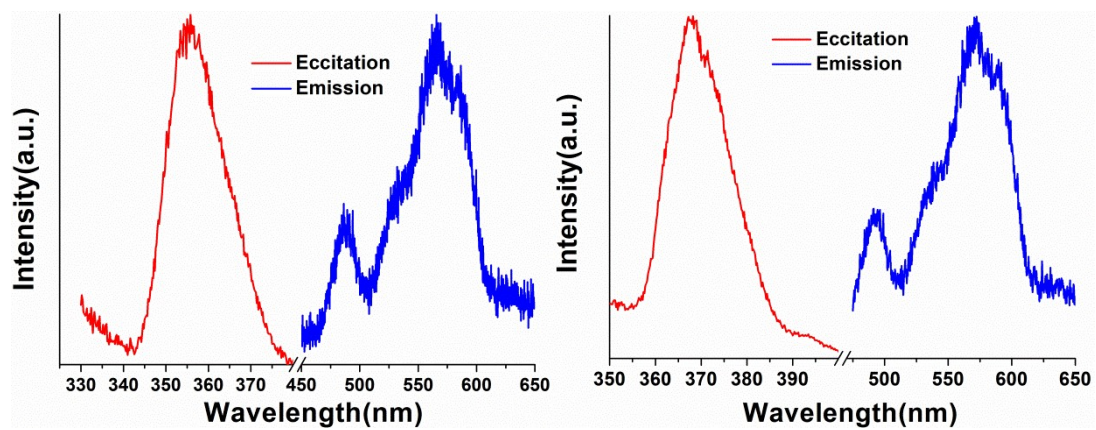

Figure S19 Room-temperature luminescence spectra of complexes 1 and 3.
